# Supplementary material for: Dispersal and metapopulation stability
Source: PubMed Central journal article supplement (PMC4636407; doi:10.7717/peerj.1295), 2015-10-01

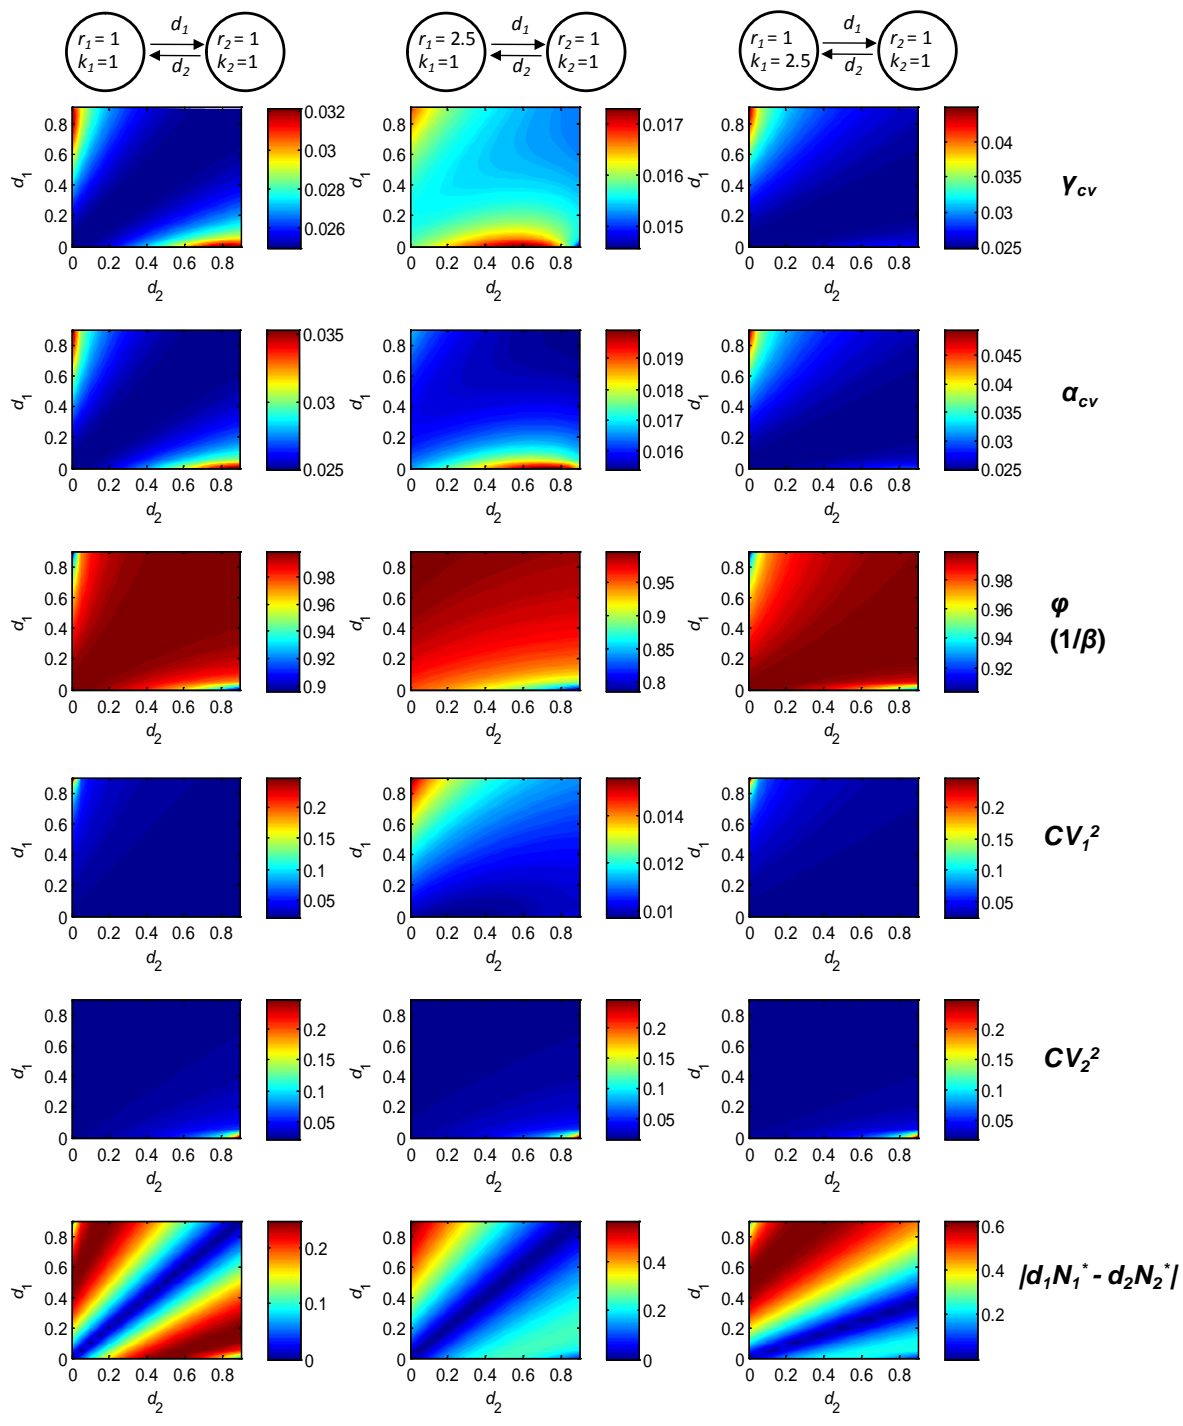

Supplement: peerj-03-1295-s006.pdf [file peerj-03-1295-s006.pdf]
